# Supplementary material for: Pysanka-Inspired Electrode Modification with Aptamer Encapsulation in ZIF-8 for Urine Creatinine Electrochemical Biosensing
Source: MDPI journal article supplement (doi:10.3390/chemosensors11110557), 2023-11-06
Supplement: s1 [file s1]

# Supplementary Information

## Pysanka-inspired Electrode Modification with Aptamer Encapsulation in ZIF-8 for Urine Creatinine Electrochemical Biosensing

Antra Ganguly <sup>1,±</sup>, Anirban Paul <sup>1,±</sup> and Shalini Prasad <sup>1,\*</sup>

<sup>1</sup> Department of Bioengineering, University of Texas at Dallas, Richardson, TX 75080, USA

<sup>±</sup> These authors contributed equally.

<sup>\*</sup> Correspondence: shalini.prasad@utdallas.edu

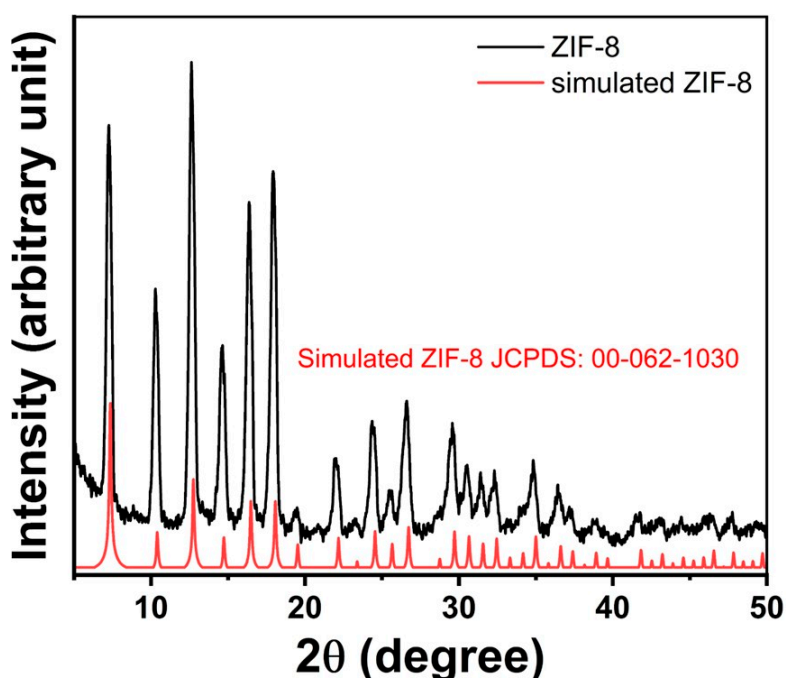

**Figure S1.** PXRD comparison of synthesized ZIF-8 and simulated ZIF-8 (JCPDS 00-062-1030) showing more than 95% peak matching depicting the purity of the synthesized ZIF-8.

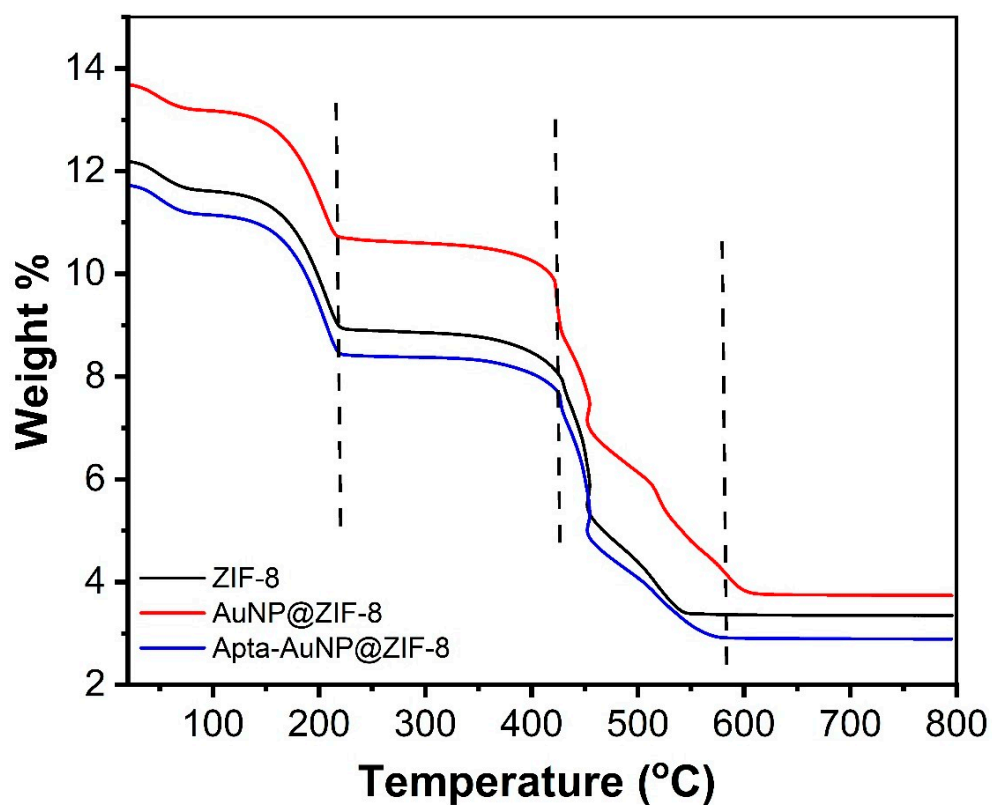

**Figure S2.** TGA comparative analysis of as-synthesized material having three distinct decomposition phases depicting rigidity and stability of the composite materials.

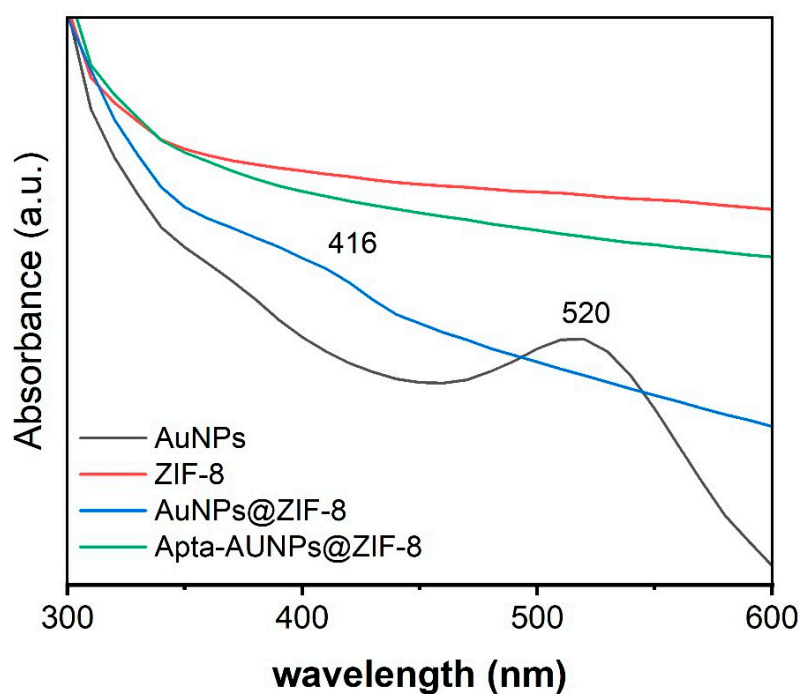

**Figure S3.** UV-Vis characteristics of AuNPs showing peak at 520 nm and depicting the size of the AuNPs as 5 nm.

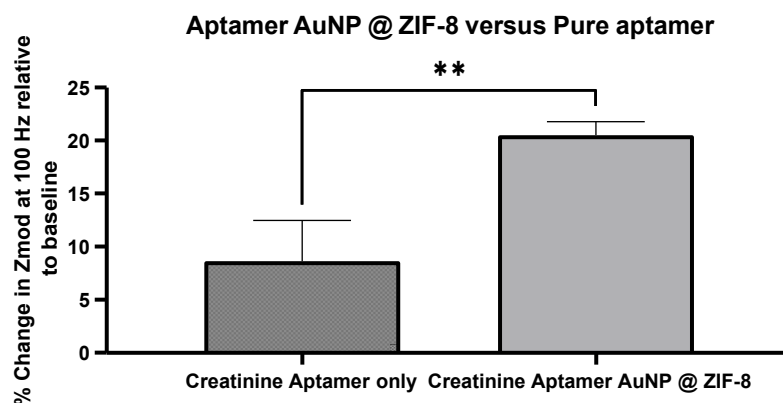

**Figure S4.** The EIS response of the novel creatinine aptamer AuNP@ ZIF-8 material was compared with that of the pure creatinine aptamer-only system using a similar electrochemical system at 0.1  $\mu\text{g/mL}$ . As expected, we observed an enhancement in the output response (expressed as a relative change in modulus of impedance at 100 Hz with respect to the baseline dose) in the case of the novel material. The response due to the novel material was significantly different ( $p < 0.05$ ) and more than double that due to the plain aptamer-only system. This is because, in the proposed material, a layer of the gold nanoparticle and anti-creatinine aptamer encapsulated ZIF-8 complex is used to modify the working electrode. This encapsulated MOF results in a hybrid capture probe where the anti-creatinine aptamer lends it high specificity and the nano-porosity of the MOF layer and the gold nanoparticles provide high sensitivity and signal enhancement.

**Table S1.** Comparative table of current methods of creatinine detection.

| Biosensing material/method   | Lower Limit of Detection (Sensitivity) | Linear Range           | Specificity | References |
|------------------------------|----------------------------------------|------------------------|-------------|------------|
| AuNP/Calix arene             | 0.01 $\mu\text{M}$                     | 0.01-0.1 $\mu\text{M}$ | High        | [1,2]      |
| Molecular Imprinting polymer | 7 $\mu\text{M}$                        | 9-100 $\mu\text{M}$    | High        | [3]        |
| Polymeric ion                | 20 $\mu\text{M}$                       | 20-2000 $\mu\text{M}$  | High        | [4]        |
| $\text{Fe}_3\text{O}_4$      | 0.2 $\mu\text{M}$                      | 1-38 $\mu\text{M}$     | Low         | [5]        |

|                                                                                                          |              |                       |      |           |
|----------------------------------------------------------------------------------------------------------|--------------|-----------------------|------|-----------|
| Starch-AgNPs on poly(pyrrole) thin film                                                                  | 0.19 $\mu$ M | 10-1000 $\mu$ M       | High | [6]       |
| Capillary–gravitational valve (Jaffe’s reaction)                                                         | 900 $\mu$ M  | 884 $\mu$ M-11.49 mM  | Low  | [7,8]     |
| AuNp (Colorimetric)                                                                                      | 12.7nM       | 0.2-1.4 $\mu$ M       | High | [9]       |
| PEG/Hg <sub>2</sub> <sup>+</sup> –AuNPs                                                                  | 9.68 nM      | 0-25 $\mu$ M          | High | [10]      |
| Pysanka-inspired Electrode Modification with Aptamer Encapsulation in ZIF-8 (Electrochemical biosensing) | 884 nM       | 0.884 $\mu$ M-8.84 mM | High | This work |

## References:

1. Dong, Y.; Liu, Y.; Lv, J.; Yang, L.; Cui, Y. Advancements in Amperometric Biosensing Instruments for Creatinine Detection: A Critical Review. *IEEE Trans Instrum Meas* **2023**, *72*, doi:10.1109/TIM.2023.3279459.
2. Pundir, C.S.; Kumar, P.; Jaiwal, R. Biosensing Methods for Determination of Creatinine: A Review. *Biosens Bioelectron* 2019, *126*, 707–724.
3. Chen, J.C.; Kumar, A.S.; Chung, H.H.; Chien, S.H.; Kuo, M.C.; Zen, J.M. An Enzymeless Electrochemical Sensor for the Selective Determination of Creatinine in Human Urine. *Sens Actuators B Chem* **2006**, *115*, doi:10.1016/j.snb.2005.10.015.
4. Han, P.; Xu, S.; Feng, S.; Hao, Y.; Wang, J. Direct Determination of Creatinine Based on Poly(Ethyleneimine)/Phosphotungstic Acid Multilayer Modified Electrode. *Talanta* **2016**, *151*, doi:10.1016/j.talanta.2016.01.017.
5. Shaidarova, L.G.; Chelnokova, I.A.; Ilina, M.A.; Leksina, Y.A.; Gedmina, A. V.; Budnikov, H.K. Amperometric Detection of Creatinine and Uric Acid at the Screen-Printed Electrode Modified by Gold Nanoparticles in Flow-Injection Analysis. *Res J Pharm Biol Chem Sci* **2015**, *6*.
6. Pothipor, C.; Lertvachirapaiboon, C.; Shinbo, K.; Kato, K.; Ounnunkad, K.; Baba, A. Detection of Creatinine Using Silver Nanoparticles on a Poly(Pyrrole) Thin Film-Based

Surface Plasmon Resonance Sensor. *Jpn J Appl Phys* **2020**, *59*, doi:10.7567/1347-4065/ab4a94.

7. Wang, A.B.; Fang, P.H.; Chu Su, Y.; Hsieh, Y.W.; Lin, C.W.; Chen, Y.T.; Hsu, Y.C. A Novel Lab-on-a-Chip Design by Sequential Capillary-Gravitational Valves for Urinary Creatinine Detection. *Sens Actuators B Chem* **2016**, *222*, doi:10.1016/j.snb.2015.08.111.
8. Jayasekhar Babu, P.; Tirkey, A.; Mohan Rao, T.J.; Chanu, N.B.; Lalchhandama, K.; Singh, Y.D. Conventional and Nanotechnology Based Sensors for Creatinine (A Kidney Biomarker) Detection: A Consolidated Review. *Anal Biochem* **2022**, *645*.
9. Du, H.; Chen, R.; Du, J.; Fan, J.; Peng, X. Gold Nanoparticle-Based Colorimetric Recognition of Creatinine with Good Selectivity and Sensitivity. *Ind Eng Chem Res* **2016**, *55*, doi:10.1021/acs.iecr.6b03433.
10. Xia, Y.; Zhu, C.; Bian, J.; Li, Y.; Liu, X.; Liu, Y. Highly Sensitive and Selective Colorimetric Detection of Creatinine Based on Synergistic Effect of PEG/Hg<sup>2+</sup>-AuNPs. *Nanomaterials* **2019**, *9*, doi:10.3390/nano9101424.
